# Supplementary material
Source: publisher figshare collection journal article supplement (https://acs.figshare.com/ndownloader/files/5165653)

# **Inkjet printing well defined polymer dots and arrays**

Berend-Jan de Gans and Ulrich S. Schubert\*

Laboratory of Macromolecular Chemistry and Nanoscience, Eindhoven University of Technology and Dutch Polymer Institute (DPI), PO Box 513, 5600 MB Eindhoven, The Netherlands; Fax: 0031 40 247 4186 / E-mail: u.s.schubert@tue.nl

## **Supporting information**

**Figure s1.** (a) Confocal scanning micrograph of a polymer deposit, formed by a droplet of a 1% wt polymethylmethacrylate solution on perfluorinated glass, using acetophenone as a solvent; (b) Cross-sections in x- and y-direction. The shape of the deposit is similar to that of polystyrene.

**Figure s2.** (a) Confocal scanning micrograph of a polymer deposit, formed by a droplet of a 1% wt polystyrene solution on perfluorinated glass, using anisole as a solvent; (b) Cross-sections in x- and y-direction. As compared to polystyrene in acetophenone, the crater of the volcano is more pronounced.

Figure 1a\_SI

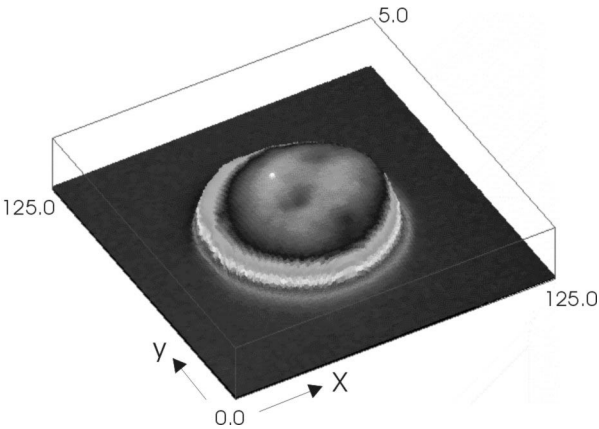

Figure 1b\_SI

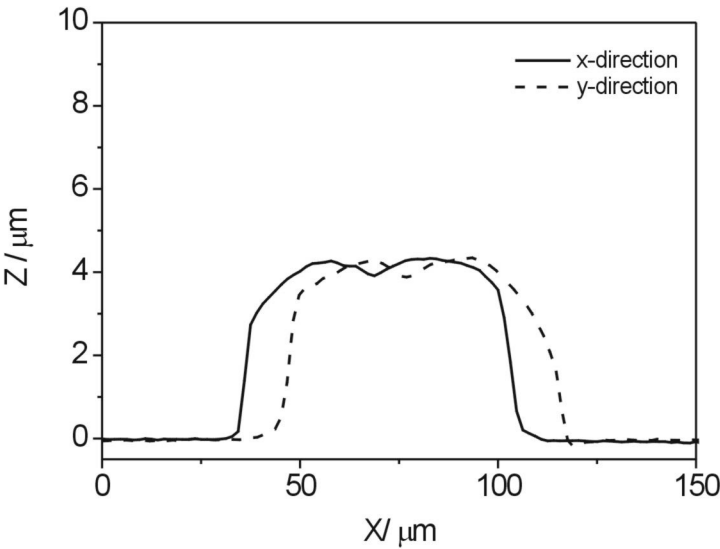

Figure 2a

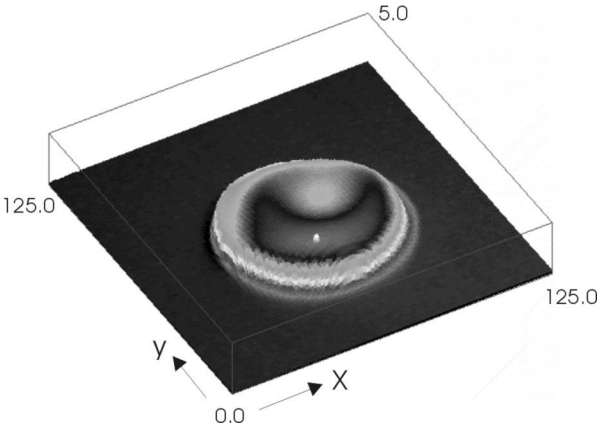

Figure 2b

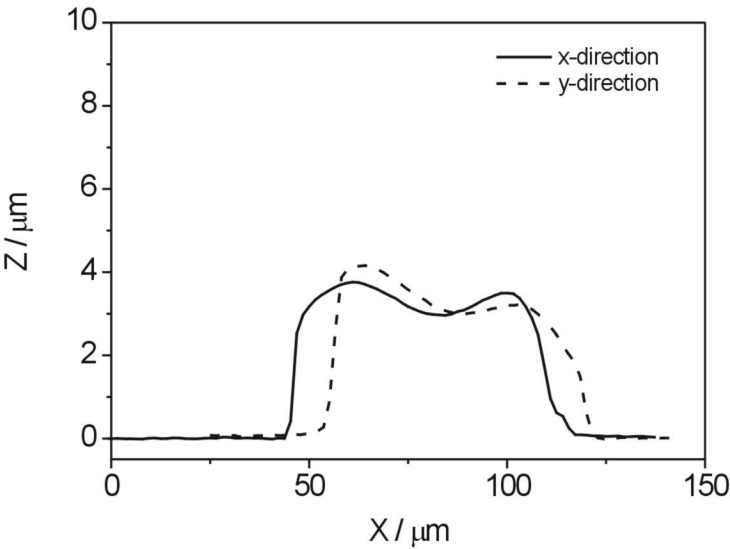

Supplement: Supplementary file 1 [file 5165653]
